# Supplementary material for: H3.3K27M-induced chromatin changes drive ectopic replication through misregulation of the JNK pathway in C. elegans
Source: PubMed Central journal article supplement (PMC6555832; doi:10.1038/s41467-019-10404-9), 2019-06-07
Supplement: 41467_2019_10404_MOESM3_ESM.pdf [file 41467_2019_10404_MOESM3_ESM.pdf]

## **Description of Additional Supplementary Files**

File Name: Supplementary Data 1

Description: Gene expression profiles of wild type and H3.3K27M mutant germlines.
