# Supplementary material for: H3.3K27M-induced chromatin changes drive ectopic replication through misregulation of the JNK pathway in C. elegans
Source: PubMed Central journal article supplement (PMC6555832; doi:10.1038/s41467-019-10404-9), 2019-06-07
Supplement: 41467_2019_10404_MOESM5_ESM.pdf [file 41467_2019_10404_MOESM5_ESM.pdf]

## Reporting Summary

Nature Research wishes to improve the reproducibility of the work that we publish. This form provides structure for consistency and transparency in reporting. For further information on Nature Research policies, see [Authors & Referees](#) and the [Editorial Policy Checklist](#).

### Statistics

For all statistical analyses, confirm that the following items are present in the figure legend, table legend, main text, or Methods section.

n/a Confirmed

- The exact sample size ( $n$ ) for each experimental group/condition, given as a discrete number and unit of measurement
- A statement on whether measurements were taken from distinct samples or whether the same sample was measured repeatedly
- The statistical test(s) used AND whether they are one- or two-sided  
*Only common tests should be described solely by name; describe more complex techniques in the Methods section.*
- A description of all covariates tested
- A description of any assumptions or corrections, such as tests of normality and adjustment for multiple comparisons
- A full description of the statistical parameters including central tendency (e.g. means) or other basic estimates (e.g. regression coefficient) AND variation (e.g. standard deviation) or associated estimates of uncertainty (e.g. confidence intervals)
- For null hypothesis testing, the test statistic (e.g.  $F$ ,  $t$ ,  $r$ ) with confidence intervals, effect sizes, degrees of freedom and  $P$  value noted  
*Give  $P$  values as exact values whenever suitable.*
- For Bayesian analysis, information on the choice of priors and Markov chain Monte Carlo settings
- For hierarchical and complex designs, identification of the appropriate level for tests and full reporting of outcomes
- Estimates of effect sizes (e.g. Cohen's  $d$ , Pearson's  $r$ ), indicating how they were calculated

*Our web collection on [statistics for biologists](#) contains articles on many of the points above.*

### Software and code

Policy information about [availability of computer code](#)

#### Data collection

All genomic data was collected using Illumina HiSeq 2500 machines at the Genomics Platform of the iGE3 at the University of Geneva. Images were obtained using a Leica DM5000 B fluorescent microscope or a Leica SP8 confocal microscope.

#### Data analysis

For ChIP-seq data, raw reads of 50 bases were generated using Illumina HiSeq 2500. The raw sequencing data was aligned to the *C. elegans* reference genome (WBcel215) with Novoalign (default parameters), producing SAM files. Reads were converted to JSON files and then to BEDGraphs with UNIX and R scripts. Genome browser images were obtained using the Sushi Bioconductor package. Heatmaps and hierarchical clustering were performed with Morpheus software (<https://software.broadinstitute.org/morpheus>). Function approximation was performed with Solver, a Microsoft Excel add-in program.

For RNA-seq data, raw reads of 50 bases were generated using Illumina HiSeq 2500. The reads were mapped with the TopHat v2.0.13 (default parameters) software to the *C. elegans* reference genome (WBcel235). Read counts representing the total number of reads aligning to each genomic feature were produced from aligned reads by the Python software htseq-count (`-mode = union`, with HTSeq v.0.6.1) with the reference .gtf file. The normalization and differential expression analysis between samples was performed with the R/Bioconductor package edgeR v.3.10.5 for the genes annotated in the reference genome.

Fluorescence images were processed using Fiji (Shindelin et al. 2012).

For manuscripts utilizing custom algorithms or software that are central to the research but not yet described in published literature, software must be made available to editors/reviewers. We strongly encourage code deposition in a community repository (e.g. GitHub). See the Nature Research [guidelines for submitting code & software](#) for further information.

## Data

Policy information about [availability of data](#)

All manuscripts must include a [data availability statement](#). This statement should provide the following information, where applicable:

- Accession codes, unique identifiers, or web links for publicly available datasets
- A list of figures that have associated raw data
- A description of any restrictions on data availability

Sequencing data has been deposited at the Gene Expression Omnibus (GEO) under accession number GSE117533. Raw and processed data deposited at the GEO were used in Figures 3 and 4, and Supplementary Figures 2, 4, 5, 6, 8 and 9. The data are available for the reviewers (see below for access), but restricted for the public until the manuscript is published. For reviewer access, see below.

## Field-specific reporting

Please select the one below that is the best fit for your research. If you are not sure, read the appropriate sections before making your selection.

- Life sciences       Behavioural & social sciences       Ecological, evolutionary & environmental sciences

For a reference copy of the document with all sections, see [nature.com/documents/nr-reporting-summary-flat.pdf](https://www.nature.com/documents/nr-reporting-summary-flat.pdf)

## Life sciences study design

All studies must disclose on these points even when the disclosure is negative.

|                 |                                                                                                                                                                                                                                                                                                                                                                                                                                                                                                                              |
|-----------------|------------------------------------------------------------------------------------------------------------------------------------------------------------------------------------------------------------------------------------------------------------------------------------------------------------------------------------------------------------------------------------------------------------------------------------------------------------------------------------------------------------------------------|
| Sample size     | For the sterility assessment, in each repetition we examined 100 individual worms, which was sufficient to account for the phenotype variability. For ChIP-seq, each chromatin IP was performed on nuclei extracted from about 5'000'0000 worms. For RNA-seq, each replicate consisted of around 30 hand-dissected adult gonads. For cell line experiments, each replicate was based on measurements from 3 wells in 96-well plates, which reproduces the conditions performed in the original assay (Hashizume et al. 2014) |
| Data exclusions | For the sterility phenotype counts, we excluded worms that died before the end of the experiment, as the cause for an eventual absence of progeny could not be determined in this case.                                                                                                                                                                                                                                                                                                                                      |
| Replication     | Each ChIP-seq and RNA-seq analysis was performed at least in duplicate, and the results were always consistent. Sterility counts and phenotype assessment were performed at least in triplicate, and results, even in cases of phenotypes with larger variability, were consistent.                                                                                                                                                                                                                                          |
| Randomization   | Worms used for each biological replicate belonged to the same generation, and samples and controls were assessed in parallel. For replicates, we were using worms separated by at least one generation. All the worms within the analysis were subjected to the same conditions, unless otherwise indicated.                                                                                                                                                                                                                 |
| Blinding        | The experimentators were not blinded to the experimental groups, as the phenotypes were quantifiable (e.g. presence or absence of progeny, staining intensity) and were not scored according to subjective measures.                                                                                                                                                                                                                                                                                                         |

## Reporting for specific materials, systems and methods

We require information from authors about some types of materials, experimental systems and methods used in many studies. Here, indicate whether each material, system or method listed is relevant to your study. If you are not sure if a list item applies to your research, read the appropriate section before selecting a response.

### Materials & experimental systems

| n/a                                 | Involvement in the study                                        |
|-------------------------------------|-----------------------------------------------------------------|
| <input type="checkbox"/>            | <input checked="" type="checkbox"/> Antibodies                  |
| <input type="checkbox"/>            | <input checked="" type="checkbox"/> Eukaryotic cell lines       |
| <input checked="" type="checkbox"/> | <input type="checkbox"/> Palaeontology                          |
| <input type="checkbox"/>            | <input checked="" type="checkbox"/> Animals and other organisms |
| <input checked="" type="checkbox"/> | <input type="checkbox"/> Human research participants            |
| <input checked="" type="checkbox"/> | <input type="checkbox"/> Clinical data                          |

### Methods

| n/a                                 | Involvement in the study                        |
|-------------------------------------|-------------------------------------------------|
| <input type="checkbox"/>            | <input checked="" type="checkbox"/> ChIP-seq    |
| <input checked="" type="checkbox"/> | <input type="checkbox"/> Flow cytometry         |
| <input checked="" type="checkbox"/> | <input type="checkbox"/> MRI-based neuroimaging |

## Antibodies

Antibodies used

anti-H3K4me3 antibody (Abcam ab8580, lot:GR3175719-3)  
 anti-H3K27me2me3 antibody (Active Motif 39535, lot:30617013)  
 anti-H3K36me3 antibody (Abcam 9050, lot:GR3198867-1)  
 anti-OLLAS antibody (Novus Biologicals NBP1-06713B, lot:F-7)  
 anti-H3 phosphoS10 antibody (Abcam ab5176, lot:GR264582-1)

anti-POLD2 antibody (Thermo Fisher Scientific PA5-55401, lot:A106098)  
 anti-RAD-51 antibody (Novus Biologicals 29480002)  
 anti-BrdU antibody (BD535 Pharmingen 555627, lot:7033666)  
 anti-histone H3, abcam ab1791, lot:GR210026-1)

## Validation

anti-H3K4me3 - used by us for IF, validated for that purpose in *C. elegans* by the manufacturer. Staining pattern in wildtype animals consistent with previously published results for the same modification.

anti-H3K27me3 - used by us for IF, WB, ChIP-seq, validated for all purposes by the manufacturer, validated for *C. elegans* by Gaydos et al. 2012. Staining and genome-wide incorporation patterns in wildtype animals consistent with previously published results for the same modification.

anti-H3K36me3 - used by us for IF ChIP-seq, validated for those purposes and for *C. elegans* by the manufacturer. Genome-wide incorporation patterns in wild type animals consistent with previously published results for the same modification (Gaydos et al. 2012).

anti-OLLAS - used by us for IF, WB, ChIP-seq, validated for all purposes by the manufacturer, validated for *C. elegans* by Paix et al. 2017. Validated by absence of signal in worms not containing epitope.

anti-H3 phosphoS10 - used by us for IF and validated for that purpose by the manufacturer, not validated for *C. elegans*, but in wild type animals reproduced staining for the same mark in Jer-Yuan Hsu et al. 2000.

anti-POLD2 - used by us for IF and validated for that purpose by the manufacturer, not previously validated for *C. elegans*. Staining pattern in wildtype animals as expected from other replication markers.

anti-RAD51 - used by us for IF and validated for that purpose and for *C. elegans* by Waters et al 2012. Staining pattern in wildtype animals consistent with previously published results for the same protein.

anti-histone H3 - used by us for IF and WB, validated for that purpose and for *C. elegans* by the manufacturer.

anti-BrdU - used by us for IF and validated for that purpose and for *C. elegans* by Crittenden & Kimble, 2008. Staining pattern in wildtype animals as expected from other replication markers.

## Eukaryotic cell lines

Policy information about [cell lines](#)

Cell line source(s)

SF8628 cell line - purchased from Merck (SCC127)  
 SF9402 and SF9427 - provided by Prof. Rintaro Hashizume (Northwestern University)

Authentication

Cell lines were not identified.

Mycoplasma contamination

Cell lines were not tested on mycoplasma presence.

Commonly misidentified lines  
 (See [ICLAC](#) register)

No commonly misidentified cell lines were used in this study.

## Animals and other organisms

Policy information about [studies involving animals](#); [ARRIVE guidelines](#) recommended for reporting animal research

Laboratory animals

No laboratory animals were used in this study.

Wild animals

No wild animals were used in this study.

Field-collected samples

Study did not involve samples collected in the field.

Ethics oversight

No ethical approval or guidance was required, as the study used nematode *C. elegans* as a model system.

Note that full information on the approval of the study protocol must also be provided in the manuscript.

## ChIP-seq

Data deposition

Confirm that both raw and final processed data have been deposited in a public database such as [GEO](#).

Confirm that you have deposited or provided access to graph files (e.g. BED files) for the called peaks.

## Data access links

*May remain private before publication.*

To review GEO accession GSE117533:

Go to <https://www.ncbi.nlm.nih.gov/geo/query/acc.cgi?acc=GSE117533>

Enter token qrwjaicpxqlrsd into the box

## Files in database submission

N2\_H3K27me3\_100bp\_delta.bed  
N2\_H3K27me3\_1kb\_ratio.bed  
N2\_H3K27me3\_1kb\_logratio.bed  
N2\_H3K27me3\_10kb\_logratio.bed  
N2\_H3K36me3\_100bp\_delta.bed  
N2\_H3K36me3\_1kb\_logratio.bed  
FAS58\_H3K27me3\_100bp\_delta.bed  
FAS58\_H3K27me3\_1kb\_ratio.bed  
FAS58\_H3K27me3\_1kb\_logratio.bed  
FAS58\_H3K27me3\_10kb\_logratio.bed  
FAS58\_H3K36me3\_100bp\_delta.bed  
FAS58\_H3K36me3\_1kb\_logratio.bed  
FAS100\_H3K27me3\_100bp\_delta.bed  
FAS100\_H3K27me3\_1kb\_logratio.bed  
FAS100\_H3K27me3\_10kb\_logratio.bed  
FAS104\_H3K27me3\_100bp\_delta.bed  
FAS104\_H3K27me3\_1kb\_logratio.bed  
FAS104\_H3K27me3\_10kb\_logratio.bed  
FAS107\_H3.3::OLLAS\_100bp\_delta.bed  
FAS107\_H3.3::OLLAS\_1kb\_logratio.bed  
FAS107\_H3.3::OLLAS\_10kb\_logratio.bed  
FAS119\_H3.3K27M::OLLAS\_100bp\_delta.bed  
FAS119\_H3.3K27M::OLLAS\_1kb\_logratio.bed  
FAS119\_H3.3K27M::OLLAS\_10kb\_logratio.bed  
FAS138\_H3-likeK27M::OLLAS\_100bp\_delta.bed  
FAS138\_H3-likeK27M::OLLAS\_1kb\_logratio.bed  
FAS138\_H3-likeK27M::OLLAS\_10kb\_logratio.bed  
N2\_gonads\_1kb\_just\_reads.bed  
FAS58\_endo\_1kb\_just\_reads.bed  
N0\_i\_me3\_L1\_R1\_001\_Tx7RjhFo9Das.fastq  
N0\_i\_me3\_L1\_R2\_001\_oF5daS6kYaHq.fastq  
N0\_b\_me3\_L1\_R1\_001\_akHe5aLqp6la.fastq  
N0\_b\_me3\_L1\_R2\_001\_djzhG9anl1kw.fastq  
N2\_i\_27d\_L2\_R1\_001\_as5dHJse9aDF.fastq  
N2\_i\_27d\_L2\_R2\_001\_awq6gDFt7hAz.fastq  
N2\_b\_27d\_L2\_R1\_001\_a5RfTGashy7Ua.fastq  
N2\_b\_27d\_L2\_R2\_001\_sdr6TFgyH0Ai.fastq  
N2\_i\_27\_L1\_R1\_001\_8Hathd5ahYD.fastq  
N2\_i\_27\_L1\_R2\_001\_trg3sJKyr7wd.fastq  
N2\_b\_27\_L1\_R1\_001\_2dGFthFa7wJh.fastq  
N2\_b\_27\_L1\_R2\_001\_p9Las7hGfTy2.fastq  
B6\_L1\_R1\_001\_NvPLGK1e8zuB.fastq  
B6\_L1\_R2\_001\_npV0GhVS0tBk.fastq  
B9\_L1\_R1\_001\_rXS5WQUbAles.fastq  
B9\_L1\_R2\_001\_QjdvrcvOjEf.fastq  
A6\_L1\_R1\_001\_1qF1jg2jlpVO.fastq  
A6\_L1\_R2\_001\_eJcWWEku8pp2.fastq  
A9\_L1\_R1\_001\_qyaslwAAERsk.fastq  
A9\_L1\_R2\_001\_vhOpl251nK4V.fastq  
J6\_L1\_R1\_001\_3wgcgGRS6Yvf.fastq  
J6\_L1\_R2\_001\_S2uws1UCBqFl.fastq  
J9\_L1\_R1\_001\_sb8ka2dBfHz.fastq  
J9\_L1\_R2\_001\_R7DVcR4KY2dY.fastq  
F585\_i\_me3\_L2\_R1\_001\_md6KAlv6385v.fastq  
F585\_i\_me3\_L2\_R2\_001\_uAy5ZAzVpemX.fastq  
F585\_b\_me3\_L2\_R1\_001\_EYWoVDIR3jJZ.fastq  
F585\_b\_me3\_L2\_R2\_001\_S3w2te82vf6i.fastq  
58\_i\_27d\_L5\_R1\_001\_BqHbpUOWcR46.fastq  
58\_i\_27d\_L5\_R2\_001\_8uRRIM8Y5bMB.fastq  
58\_b\_27d\_L5\_R1\_001\_ljOi7fQxhin.fastq  
58\_b\_27d\_L5\_R2\_001\_ULZauuFpQwt.fastq  
58\_i\_27\_L5\_R1\_001\_hOhbyAaLv5RE.fastq  
58\_i\_27\_L5\_R2\_001\_yntbGWhwPT3.fastq  
58\_b\_27\_L5\_R1\_001\_IFngFLLxYzl.fastq  
58\_b\_27\_L5\_R2\_001\_Cof81bzqYRqR.fastq  
L6\_L1\_R1\_001\_MOtSwAsRpxOP.fastq  
L6\_L1\_R2\_001\_fzFFP4IkpYgg.fastq  
L9\_L1\_R1\_001\_1cPXHvsTEY2d.fastq  
L9\_L1\_R2\_001\_V7XzoJRHxQ5s.fastq  
D6\_L2\_R1\_001\_ABDfJZANme8L.fastq

D6\_L2\_R2\_001\_qtNHZJ21kZbE.fastq  
D9\_L2\_R1\_001\_bp0ZVyD2CqiU.fastq  
D9\_L2\_R2\_001\_Vdy5Of8LQQ7S.fastq  
K3\_L1\_R1\_001\_wGcmAqNN3tvW.fastq  
K3\_L1\_R2\_001\_6LYdE37rSidd.fastq  
K4\_L1\_R1\_001\_J6woMrtN4ORG.fastq  
K4\_L1\_R2\_001\_cqv3lqLwWth0.fastq  
G6\_L1\_R1\_001\_kleuPONxMajB.fastq  
G6\_L1\_R2\_001\_jEZumjFn6fG7.fastq  
G9\_L1\_R1\_001\_Tv71FYjwYulx.fastq  
G9\_L1\_R2\_001\_5dIUd00kxC7n.fastq  
Z3\_L4\_R1\_001\_jjUfgRP0lgCm.fastq  
Z3\_L4\_R2\_001\_onkbzRLF4wuX.fastq  
Z4\_L4\_R1\_001\_1NIJ7IZsKkGR.fastq  
Z4\_L4\_R2\_001\_w8l95mzgra5B.fastq  
H6\_L1\_R1\_001\_AuVUOtGB2MTG.fastq  
H6\_L1\_R2\_001\_abVUodUTdgBD.fastq  
H9\_L1\_R1\_001\_SMOFYBGlgkUX.fastq  
H9\_L1\_R2\_001\_MtKXAhrsYGVW8.fastq  
PS27\_L4\_R1\_001\_iJK2rGnM5Cc.fastq  
PS27\_L4\_R2\_001\_IAl5TGDDVUvw.fastq  
PS28\_L4\_R1\_001\_l2vGEvqc27tu.fastq  
PS28\_L4\_R2\_001\_iSNMptlTYzzW.fastq  
PS29\_L4\_R1\_001\_Al13OzBrJtbk.fastq  
PS29\_L4\_R2\_001\_eJrDW66sk78C.fastq  
PS30\_L4\_R1\_001\_D9NrrKLBZJPg.fastq  
PS30\_L4\_R2\_001\_XN2hTvwu8upT.fastq  
A12\_L1\_R1\_001\_GrxOi1ed63ah.fastq  
A12\_L1\_R2\_001\_0wEE4gJOKOMP.fastq  
A13\_L1\_R1\_001\_8SBeqfnOenaM.fastq  
A13\_L1\_R2\_001\_olclPd3nqNzl.fastq  
PS15\_L3\_R1\_001\_9GWbKclaETP9.fastq  
PS15\_L3\_R2\_001\_sS1Z5ZNkvquK.fastq  
PS16\_L3\_R1\_001\_EtpQYVxHmrsC.fastq  
PS16\_L3\_R2\_001\_3jkFzrHAREFi.fastq  
PS17\_L3\_R1\_001\_uBU8xsHVCsq3.fastq  
PS17\_L3\_R2\_001\_HzFYghS1uYPq.fastq  
PS18\_L3\_R1\_001\_3DD93ajGteJ1.fastq  
PS18\_L3\_R2\_001\_eMJYJGQPG1P8.fastq  
A16\_L1\_R1\_001\_mudLlxxmbXw0.fastq  
A16\_L1\_R2\_001\_QXgm5E5krxzN.fastq  
A17\_L1\_R1\_001\_OUxD41YNN9SA.fastq  
A17\_L1\_R2\_001\_u4QCxQ3zfcwj.fastq  
Z7\_L4\_R1\_001\_86lqoKDKwrlW.fastq  
Z7\_L4\_R2\_001\_vJhvc9ZJeTN.fastq  
Z8\_L4\_R1\_001\_xk39kaySWYtp.fastq  
Z8\_L4\_R2\_001\_fFQhA5oTD5h8.fastq  
1A\_L1\_R1\_001\_WBfN2YKfw6Tg.fastq  
1A\_L1\_R2\_001\_nJJeOYUgOLEi.fastq  
1B\_L1\_R1\_001\_q6jEaSgVT9GQ.fastq  
1B\_L1\_R2\_001\_W1hUMW0JKvr6.fastq  
1C\_L1\_R1\_001\_OC1p555GoiU9.fastq  
1C\_L1\_R2\_001\_P85b4DANI04j.fastq  
1D\_L1\_R1\_001\_7sZBqtXmqayq.fastq  
1D\_L1\_R2\_001\_7QUnBsCckZwB.fastq  
1E\_L1\_R1\_001\_jtisCF3pgxzV.fastq  
1E\_L1\_R2\_001\_8xb7HnuNp9k8.fastq  
1F\_L1\_R1\_001\_k4jwPZ1U11wD.fastq  
1F\_L1\_R2\_001\_8APeDxSzdfoX.fastq  
1G\_L1\_R1\_001\_aosjTYiCuBMU.fastq  
1G\_L1\_R2\_001\_pxkya38IHkgD.fastq  
1H\_L1\_R1\_001\_LaqnlzTEQCnM.fastq  
1H\_L1\_R2\_001\_l6pmlDAAGTeB.fastq  
N2\_2\_L8\_R1\_001\_cG0ZVwKUnjG.fastq  
endo\_2\_L8\_R1\_001\_OyYnKlyE0gH.fastq  
C6\_L2\_R1\_001\_JdMDD4yap2T.fastq  
C6\_L2\_R2\_001\_z7O8dNUpDCCq.fastq  
K6\_L1\_R1\_001\_tayMjNPPZZPc.fastq  
K6\_L1\_R2\_001\_UCm6dvHsJeQX.fastq  
C9\_L2\_R1\_001\_unC6BJQBTdo2.fastq  
C9\_L2\_R2\_001\_ullfet8kM4ph.fastq  
K9\_L1\_R1\_001\_JHQ6KwnU44t4.fastq  
K9\_L1\_R2\_001\_4iSFT6wVqDHA.fastq  
E6\_L2\_R1\_001\_3rP6MxsKSWJ6.fastq  
E6\_L2\_R2\_001\_jckchdD7I8bt.fastq

M6\_L1\_R1\_001\_C1KKhzEf47WU.fastq  
 M6\_L1\_R2\_001\_Vh8pEyOJ8FGH.fastq  
 E9\_L2\_R1\_001\_r498aHCskslq.fastq  
 E9\_L2\_R2\_001\_X55zrRhMD94B.fastq  
 M9\_L1\_R1\_001\_E2h92wfp5IT8.fastq  
 M9\_L1\_R2\_001\_ekpx47SZoeQl.fastq

Genome browser session  
 (e.g. [UCSC](https://genome.ucsc.edu))

[https://genome.ucsc.edu/cgi-bin/hgTracks?hgS\\_doOtherUser=submit&hgS\\_otherUserName=kdelaney&hgS\\_otherUserSessionName=Delaney\\_et\\_al](https://genome.ucsc.edu/cgi-bin/hgTracks?hgS_doOtherUser=submit&hgS_otherUserName=kdelaney&hgS_otherUserSessionName=Delaney_et_al)

## Methodology

### Replicates

All of the final files are build on several biological replicates. For each experiment we performed:

N2\_H3K27me3\_ChIP - 6 biological replicates  
 N2\_H3K36me3\_ChIP - 2 biological replicates  
 FAS58\_H3K27me3\_ChIP - 5 biological replicates  
 FAS58\_H3K36me3\_ChIP - 2 biological replicates  
 FAS100\_H3K27me3\_ChIP - 3 biological replicates  
 FAS104\_H3K27me3\_ChIP - 3 biological replicates  
 N2\_H3.3::OLLAS\_ChIP - 3 biological replicates  
 FAS119\_H3.3K27M::OLLAS\_ChIP - 2 biological replicates  
 FAS138\_H3-likeK27M::OLLAS\_ChIP - 4 biological replicates

### Sequencing depth

In all ChIP-seq experiments reads are 50 bp and paired-end.

N2\_H3K27me3\_input - 177 630 541 total reads, 137 533 233 uniquely mapped reads (77.4%)  
 N2\_H3K27me3\_IP - 174 228 809 total reads, 129 388 719 uniquely mapped reads (74.3%)  
 N2\_H3K36me3\_input - 22 775 747 total reads, 18 422 073 uniquely mapped reads (77.5%)  
 N2\_H3K36me3\_IP - 24 333 508 total reads, 18 680 290 uniquely mapped reads (76.8%)  
 FAS58\_H3K27me3\_input - 156 762 094 total reads, 111 912 049 uniquely mapped reads (71.4%)  
 FAS58\_H3K27me3\_IP - 143 817 278 total reads, 106 161 433 uniquely mapped reads (73.8%)  
 FAS58\_H3K36me3\_input - 14 285 999 total reads, 11 412 271 uniquely mapped reads (79.9%)  
 FAS58\_H3K37me3\_IP - 24 685 561 total reads, 18 667 111 uniquely mapped reads (75.6%)  
 FAS100\_H3K27me3\_input - 76 387 554 total reads, 51 461 701 uniquely mapped reads (67.4%)  
 FAS100\_H3K27me3\_IP - 40 708 896 total reads, 32 717 068 uniquely mapped reads (80.4%)  
 FAS104\_H3K27me3\_input - 72 168 248 total reads, 52 966 138 uniquely mapped reads (73.4%)  
 FAS104\_H3K27me3\_IP - 86 263 523 total reads, 63 874 164 uniquely mapped reads (74%)  
 N2\_H3.3::OLLAS\_input - 124 937 534 total reads, 81 255 405 uniquely mapped reads (65%)  
 N2\_H3.3::OLLAS\_IP - 144 240 606 total reads, 107 270 141 uniquely mapped reads (74.4%)  
 FAS119\_H3.3K27M::OLLAS\_input - 39 660 897 total reads, 31 533 649 uniquely mapped reads (79.5%)  
 FAS119\_H3.3K27M::OLLAS\_IP - 74 934 893 total reads, 58 906 190 uniquely mapped reads (78.6%)  
 FAS138\_H3-likeK27M::OLLAS\_input - 147 494 048 total reads, 111 758 169 uniquely mapped reads (75.8%)  
 FAS138\_H3-likeK27M::OLLAS\_IP - 177 721 679 total reads, 135 833 007 uniquely mapped reads (76.4%)

### Antibodies

anti-H3K27me3 - validated for ChIP by the manufacturer, validated for C. elegans by Gaydos et al. 2012  
 anti-H3K36me3 - validated for ChIP and C. elegans the manufacturer  
 anti-OLLAS - validated for ChIP purpose by the manufacturer, validated for C. elegans by Paix et al. 2017

### Peak calling parameters

We did not perform peak calling in this study.

### Data quality

To ensure the quality of ChIP experiment we assessed the length of our reads and rejected the ones that do not fit in the expected range in the process of alignment. We also correlated repeats with each other to ensure we are merging robust, consistent repeats.

### Software

For ChIP-seq data, raw reads of 50 bases were generated using Illumina HiSeq 2500. The raw sequencing data was aligned to the C. elegans reference genome (WBcel215) with Novoalign (default parameters), producing SAM files. Reads were converted to JSON files and then to BEDGraphs with UNIX and R scripts. All files were normalized to the same number of reads. For each ChIP experiment, IP files were normalized using the input file with the corresponding bin size. Biological replicates of ChIP-seq experiments that passed the quality control were merged on the level of aligned reads (SAM files), and the downstream pipeline was performed again using the merged file and smoothed to obtain the final normalized bedgraph for each experiment. Processed data files are bedgraphs containing normalized ChIP results. Normalization was performed by input subtraction (to avoid low number of read biases; marked in the file name by\_delta) or by division of input followed by log2 transformation (marked in the file name by\_logratio). Bin sizes used in the analysis were 100 bp (marked in the file name by\_100bp), 1 kb (marked in the file name by\_1kb) or 10 kb (marked in the file name by\_10kb). The appropriate bin size was selected for each analysis. Genome browser images were obtained using the Sushi Bioconductor package. Heatmaps and hierarchical clustering were performed with Morpheus software (<https://software.broadinstitute.org/morpheus>). Function approximation was performed with Solver, a Microsoft Excel add-in program.
